# Supplementary material
Source: PubMed Central journal article supplement (PMC4312429)
Supplement: supp_kwu339_kwu339supp.pdf [file supp_kwu339_kwu339supp.pdf]

**Web Table 1. Summary statistics for the final analytical sample by country, Adults aged 50 and older, WHO SAGE 2007-2010, N=26,675**

| Country                                             | China          | Ghana          | India          | Mexico         | Russia         | South Africa   |
|-----------------------------------------------------|----------------|----------------|----------------|----------------|----------------|----------------|
| <b>Number of observations</b>                       | <b>n=9,857</b> | <b>n=3,883</b> | <b>n=5,683</b> | <b>n=1,649</b> | <b>n=3,041</b> | <b>n=2,562</b> |
| <b>Age</b>                                          |                |                |                |                |                |                |
| Aged 50-54                                          | 21.0           | 19.8           | 23.3           | 29.4           | 24.2           | 27.4           |
| Aged 55-59                                          | 22.3           | 19.3           | 25.1           | 21.3           | 20.1           | 20.8           |
| Aged 60-64                                          | 17.6           | 14.8           | 16.4           | 15.2           | 11.9           | 16.6           |
| Aged 65-69                                          | 15.1           | 12.7           | 14.6           | 11.1           | 13.3           | 14.2           |
| Aged 70-74                                          | 11.8           | 14.5           | 10.9           | 7.6            | 11.1           | 9.7            |
| Aged 75-79                                          | 7.8            | 9.0            | 5.2            | 8.3            | 11.9           | 5.9            |
| Aged 80+                                            | 4.5            | 9.9            | 4.5            | 7.1            | 7.6            | 5.5            |
| <b>Sex</b>                                          |                |                |                |                |                |                |
| Female                                              | 51.8           | 48.5           | 50.0           | 52.5           | 63.0           | 60.7           |
| Male                                                | 48.2           | 51.5           | 50.0           | 47.5           | 37.0           | 39.3           |
| <b>Marital Status</b>                               |                |                |                |                |                |                |
| Not married/cohabitating                            | 15.3           | 41.3           | 23.1           | 20.4           | 42.7           | 47.0           |
| Married/cohabitating                                | 84.7           | 58.7           | 77.0           | 79.6           | 57.3           | 53.0           |
| <b>Residence</b>                                    |                |                |                |                |                |                |
| Urban                                               | 45.4           | 41.0           | 25.7           | 79.0           | 72.0           | 67.5           |
| Rural                                               | 54.6           | 59.0           | 74.3           | 21.0           | 28.0           | 32.5           |
| <b>Education</b>                                    |                |                |                |                |                |                |
| No schooling                                        | 23.8           | 53.5           | 51.5           | 19.0           | 0.7            | 21.5           |
| Less than primary                                   | 19.9           | 10.6           | 10.2           | 34.1           | 1.2            | 25.4           |
| Completed primary                                   | 21.2           | 11.2           | 14.6           | 23.6           | 5.1            | 23.5           |
| Completed secondary                                 | 19.4           | 4.1            | 10.3           | 11.8           | 20.1           | 14.3           |
| Completed high school                               | 11.5           | 16.9           | 8.1            | 2.4            | 55.2           | 9.5            |
| Completed college/university                        | 4.2            | 3.7            | 5.3            | 9.2            | 17.8           | 5.8            |
| <b>Permanent income index (tertiles by country)</b> |                |                |                |                |                |                |
| Low income index                                    | 33.6           | 32.8           | 33.2           | 32.4           | 31.4           | 30.6           |
| Middle income index                                 | 33.9           | 33.6           | 33.4           | 32.5           | 34.8           | 34.6           |
| High income index                                   | 32.5           | 33.6           | 33.4           | 35.1           | 33.8           | 34.9           |
| <b>Work status</b>                                  |                |                |                |                |                |                |
| Not working                                         | 54.5           | 31.2           | 57.5           | 64.3           | 61.0           | 71.9           |
| Currently working                                   | 45.5           | 68.8           | 42.5           | 35.7           | 39.0           | 28.1           |
| <b>Health insurance</b>                             |                |                |                |                |                |                |
| No health insurance                                 | 9.3            | 61.1           | 95.0           | 33.1           | 0.3            | 77.7           |
| Health insurance                                    | 90.7           | 38.9           | 5.0            | 67.0           | 99.7           | 22.3           |
| <b>Body weight</b>                                  |                |                |                |                |                |                |
| Underweight                                         | 4.3            | 14.7           | 38.6           | 0.4            | 1.3            | 3.8            |
| Normal weight                                       | 60.7           | 54.9           | 48.0           | 21.3           | 23.7           | 22.8           |
| Overweight                                          | 29.1           | 20.0           | 10.9           | 49.7           | 39.2           | 26.6           |
| Obese                                               | 5.9            | 10.4           | 2.6            | 28.6           | 35.9           | 46.8           |
| <b>Smoking status</b>                               |                |                |                |                |                |                |
| Currently not smoking                               | 71.1           | 90.1           | 49.8           | 80.9           | 79.0           | 75.1           |
| Currently smoking                                   | 28.9           | 9.9            | 50.2           | 19.2           | 21.0           | 24.9           |

All estimations employed survey weights provided by SAGE.

**Web Table 2. Socio-demographic gradients in actual and potential hypertension awareness among adults aged 50 and older who were classified as having hypertension, Odds ratios of multivariable logit models, WHO SAGE 2007-2010, N=15,909**

| Country          | China<br>(95% CI)<br>n=5,969  |                                  | Ghana<br>(95% CI)<br>n=2,266  |                                  | India<br>(95% CI)<br>n=2,236  |                                  | Mexico<br>(95% CI)<br>n=1,140 |                                  | Russia<br>(95% CI)<br>n=2,277 |                                  | South Africa<br>(95% CI)<br>n=2,021 |                                  |
|------------------|-------------------------------|----------------------------------|-------------------------------|----------------------------------|-------------------------------|----------------------------------|-------------------------------|----------------------------------|-------------------------------|----------------------------------|-------------------------------------|----------------------------------|
|                  | Actual Awareness <sup>a</sup> | Potential Awareness <sup>b</sup> | Actual Awareness <sup>a</sup>       | Potential Awareness <sup>b</sup> |
| Aged 55-59       | 1.24<br>(0.99;1.56)           | 1.44***<br>(1.20;1.74)           | 1.14<br>(0.78;1.67)           | 0.95<br>(0.67;1.35)              | 0.89<br>(0.63;1.26)           | 0.87<br>(0.54;1.40)              | 7.68**<br>(2.05;28.78)        | 4.79*<br>(1.07;21.47)            | 1.10<br>(0.57;2.10)           | 1.72<br>(0.80;3.70)              | 2.01**<br>(1.30;3.11)               | 2.29***<br>(1.50;3.50)           |
| Aged 60-64       | 1.55**<br>(1.19;2.03)         | 1.60***<br>(1.23;2.07)           | 1.26<br>(0.84;1.89)           | 1.42<br>(0.96;2.09)              | 0.82<br>(0.54;1.24)           | 0.76<br>(0.42;1.37)              | 10.05***<br>(3.05;33.10)      | 3.90*<br>(1.09;13.96)            | 0.87<br>(0.42;1.80)           | 1.08<br>(0.49;2.37)              | 1.87*<br>(1.14;3.09)                | 1.29<br>(0.78;2.13)              |
| Aged 65-69       | 2.05***<br>(1.68;2.49)        | 1.80***<br>(1.44;2.24)           | 1.60*<br>(1.01;2.53)          | 1.64*<br>(1.12;2.41)             | 0.89<br>(0.59;1.35)           | 0.80<br>(0.48;1.35)              | 5.02**<br>(1.72;14.69)        | 2.86*<br>(1.07;7.68)             | 1.75<br>(0.80;3.85)           | 3.68*<br>(1.19;11.42)            | 3.70***<br>(2.35;5.84)              | 3.51***<br>(1.95;6.29)           |
| Aged 70+         | 1.95***<br>(1.59;2.40)        | 1.63***<br>(1.26;2.12)           | 1.98***<br>(1.39;2.83)        | 2.06***<br>(1.53;2.79)           | 1.23<br>(0.83;1.81)           | 0.94<br>(0.58;1.53)              | 7.54***<br>(2.35;24.19)       | 3.87*<br>(1.15;13.07)            | 1.69<br>(0.68;4.23)           | 2.98<br>(0.98;9.01)              | 2.86***<br>(1.89;4.33)              | 2.29***<br>(1.40;3.74)           |
| Female           | 1.50***<br>(1.32;1.71)        | 1.33**<br>(1.12;1.57)            | 2.13***<br>(1.63;2.79)        | 2.00***<br>(1.61;2.48)           | 2.15***<br>(1.64;2.83)        | 1.15<br>(0.80;1.67)              | 2.10*<br>(1.18;3.74)          | 1.67<br>(0.80;3.51)              | 2.76***<br>(1.79;4.25)        | 2.42***<br>(1.46;4.00)           | 1.73**<br>(1.25;2.39)               | 1.62**<br>(1.21;2.18)            |
| Urban            | 2.59***<br>(2.09;3.20)        | 1.85***<br>(1.35;2.55)           | 1.97***<br>(1.46;2.67)        | 1.49**<br>(1.13;1.97)            | 1.63**<br>(1.13;2.35)         | 1.94*<br>(1.13;3.33)             | 1.12<br>(0.64;1.96)           | 0.98<br>(0.42;2.31)              | 0.62<br>(0.26;1.48)           | 0.66<br>(0.23;1.89)              | 1.29<br>(0.90;1.84)                 | 1.07<br>(0.72;1.59)              |
| Medium education | 0.95<br>(0.81;1.12)           | 0.98<br>(0.82;1.17)              | 1.49*<br>(1.07;2.07)          | 1.52**<br>(1.13;2.04)            | 0.99<br>(0.71;1.39)           | 0.84<br>(0.53;1.34)              | 1.08<br>(0.60;1.93)           | 1.31<br>(0.61;2.81)              | 0.83<br>(0.42;1.65)           | 1.05<br>(0.50;2.24)              | 1.10<br>(0.76;1.59)                 | 0.94<br>(0.60;1.47)              |
| High education   | 1.24<br>(0.99;1.54)           | 1.16<br>(0.90;1.49)              | 2.28***<br>(1.59;3.28)        | 2.28***<br>(1.64;3.23)           | 2.72***<br>(1.91;3.86)        | 1.52<br>(0.92;2.51)              | 0.94<br>(0.38;2.29)           | 0.96<br>(0.37;2.52)              | 0.73<br>(0.44;1.21)           | 0.89<br>(0.43;1.83)              | 0.86<br>(0.56;1.31)                 | 0.75<br>(0.47;1.21)              |
| Medium income    | 1.21*<br>(1.04;1.42)          | 1.15<br>(0.94;1.41)              | 1.48*<br>(1.08;2.03)          | 1.64***<br>(1.27;2.12)           | 1.56*<br>(1.04;2.35)          | 1.41<br>(0.95;2.07)              | 2.01*<br>(1.14;3.52)          | 2.38*<br>(1.23;4.59)             | 1.07<br>(0.59;1.95)           | 1.22<br>(0.63;2.36)              | 1.45<br>(0.97;2.17)                 | 1.25<br>(0.81;1.91)              |
| High income      | 1.22*<br>(1.04;1.44)          | 1.31*<br>(1.05;1.64)             | 2.70***<br>(1.95;3.75)        | 2.15***<br>(1.63;2.84)           | 1.64*<br>(1.12;2.42)          | 2.09***<br>(1.38;3.16)           | 1.50<br>(0.76;2.98)           | 2.39<br>(0.97;5.89)              | 1.62<br>(0.85;3.09)           | 1.73<br>(0.86;3.50)              | 2.16***<br>(1.38;3.39)              | 1.69*<br>(1.06;2.69)             |
| Health insurance | 1.11<br>(0.88;1.40)           | 1.33<br>(0.98;1.81)              | 1.35*<br>(1.05;1.74)          | 2.31***<br>(1.81;2.94)           | 1.01<br>(0.65;1.58)           | 1.37<br>(0.61;3.07)              | 1.45<br>(0.81;2.57)           | 1.42<br>(0.65;3.10)              | 10.08<br>(0.84;120.80)        | 28.25*<br>(2.20;363.05)          | 1.06<br>(0.73;1.54)                 | 0.63*<br>(0.41;0.97)             |

Notes: <sup>a</sup>Actual awareness=Report of a hypertension diagnosis, <sup>b</sup>Potential awareness = Actual awareness or missed opportunity for a hypertension diagnosis. Odds ratios, 95% confidence intervals in parentheses, \*p<0.05, \*\* p<0.01, \*\*\* p<0.001, All estimations employed survey weights provided by SAGE.
